# Supplementary material for: Developing a Tool to Support Communication of Parental Concerns When a Child is in Hospital
Source: MDPI journal article supplement (doi:10.3390/healthcare4010009), 2016-01-13
Supplement: s1 [file s1]

## Talk to us – we are listening

- There is no such thing as a silly question.
- Asking questions will NOT affect your child's care.
- Don't worry if you get upset, it's ok.
- If you're not sure what the nurses or doctors are doing, ask them to explain it to you.
- If you think something is wrong, don't wait to talk to us.

## Are you worried about your child? Talk to your nurse

- Does your child seem different to their normal self?
- Is it something you can see? Is it something you feel?
- Is it something your child is doing/not doing?

**Thinking about the things above might help you describe your worry to staff. The diagram overleaf may help you too. Use the "Talking to staff about your worries: Planning care together" form to communicate your worries to staff.**

**"You might spot something sooner than the health professionals"**

Most of the time when your child is in hospital you won't feel the need to alert someone about your child's condition. Sometimes you may be worried and this leaflet will help you to talk to staff.

**No one knows your child better than you. You have an important role to play in the care of your child and we will listen to you.**

**"I don't know what it is but my child is 'just not right'"**

### **Our Birmingham Children's Hospital Trust Values reflect how we will listen to you**

You can **Trust** us to listen to your worries and feelings.

We are **Committed** to listening to you and involve you in decisions relating to your child.

We **Respect** the knowledge you have about your child and will listen to you.

We demonstrate **Compassion** by listening and understanding worries you have about your child.

We support you to have **Courage** to respectfully challenge us and we have courage to listen to you.

**We have heard you**

# Listening to you

A guide to help parents discuss worries or concerns about their child with Health Professionals.

You know your child best and we will listen to you.

## Look at your child

Use this diagram as a guide to help you describe what is making you worried.

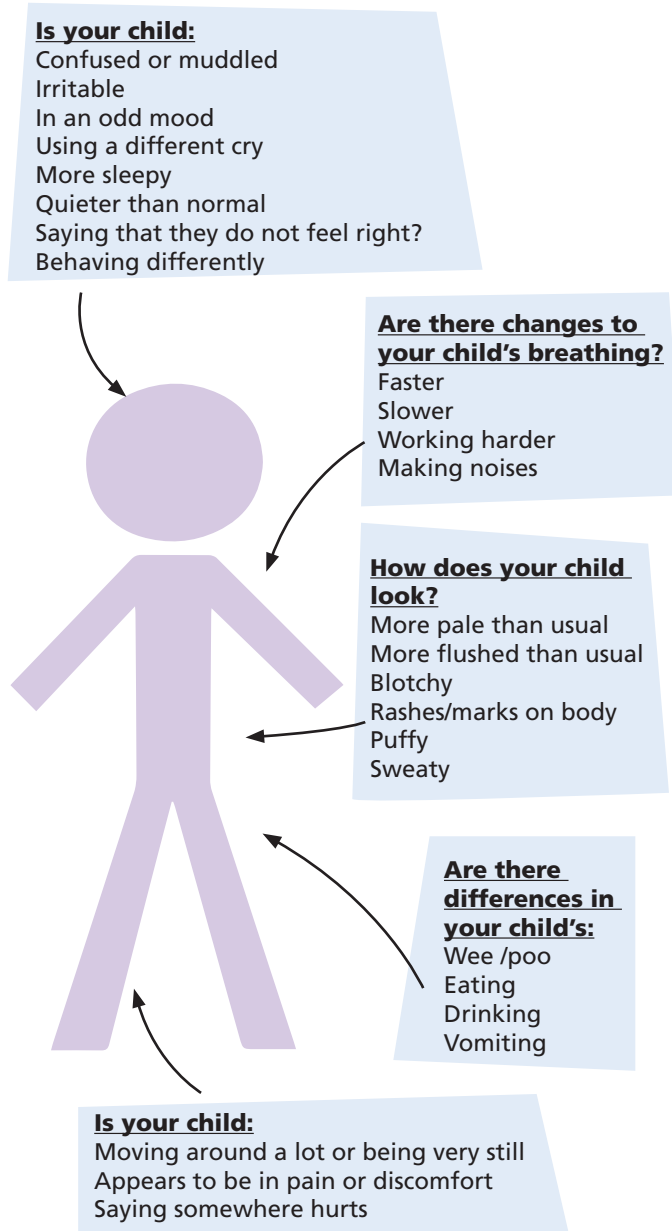

These are just examples; if you see any other signs please tell us what they are, talk to your nurse or doctor.

## What to do next, you may not need to progress any further than step 1.

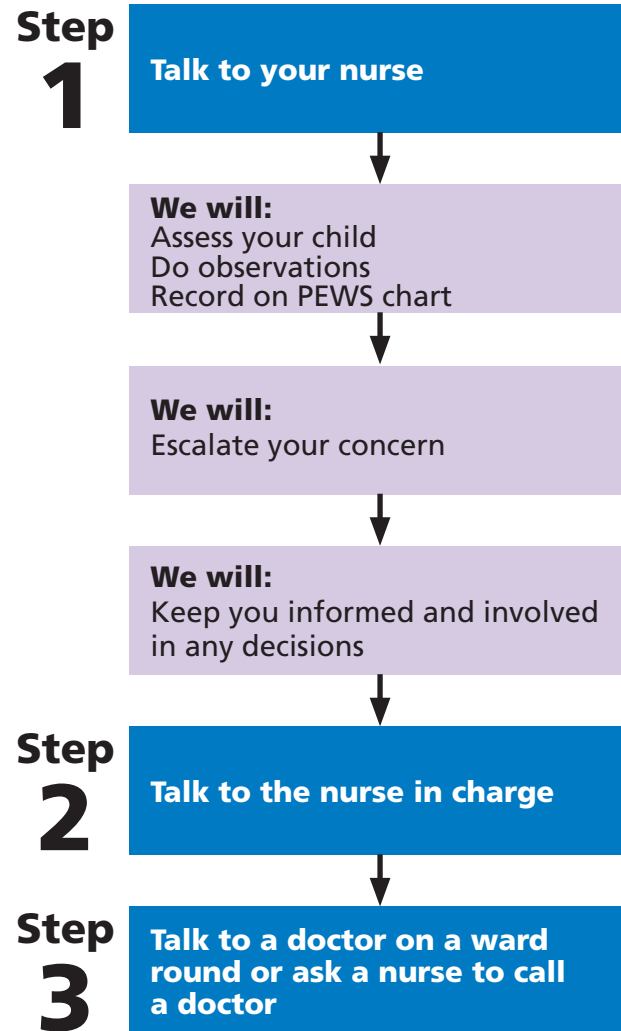

### Definitions:

**PEWS** = Paediatric Early Warning Signs - the coloured chart that the nurses write the observations on

**Escalate your concern** - raise your worry to get your child re-assessed by a senior member of staff.

## You may use these tips to help you describe your worry to staff

### STARTING THE CONVERSATION

Your nurse or doctor may be attending to another patient so make sure that you have the full attention of the nurse / doctor before discussing your worries.

**I need to talk to you about my child as I am worried**

### MY CONCERN

Tell the nurse / doctor that you feel that something is not right and what your worry is. Try and give them as much information as possible. You may find your notes or stick diagram helpful.

**I am worried that he is sleeping too much**

### REASON / SOLUTION

Tell them if you have an idea of what is going wrong and what will help

**He has been sleepy since his pain medication was changed**

### AGREEMENT

The nurse / doctor will discuss the plan of action with you and this will be recorded in the notes

**The nurse has come back to me to say they have spoken to the doctor who will review his pain medicine and get back to us**
