# Supplementary material for: Developing a Tool to Support Communication of Parental Concerns When a Child is in Hospital
Source: MDPI journal article supplement (doi:10.3390/healthcare4010009), 2016-01-13

# Listening to you

A guide to help parents discuss worries or concerns about their child with Health Professionals. You may not need to progress any further than step 1.

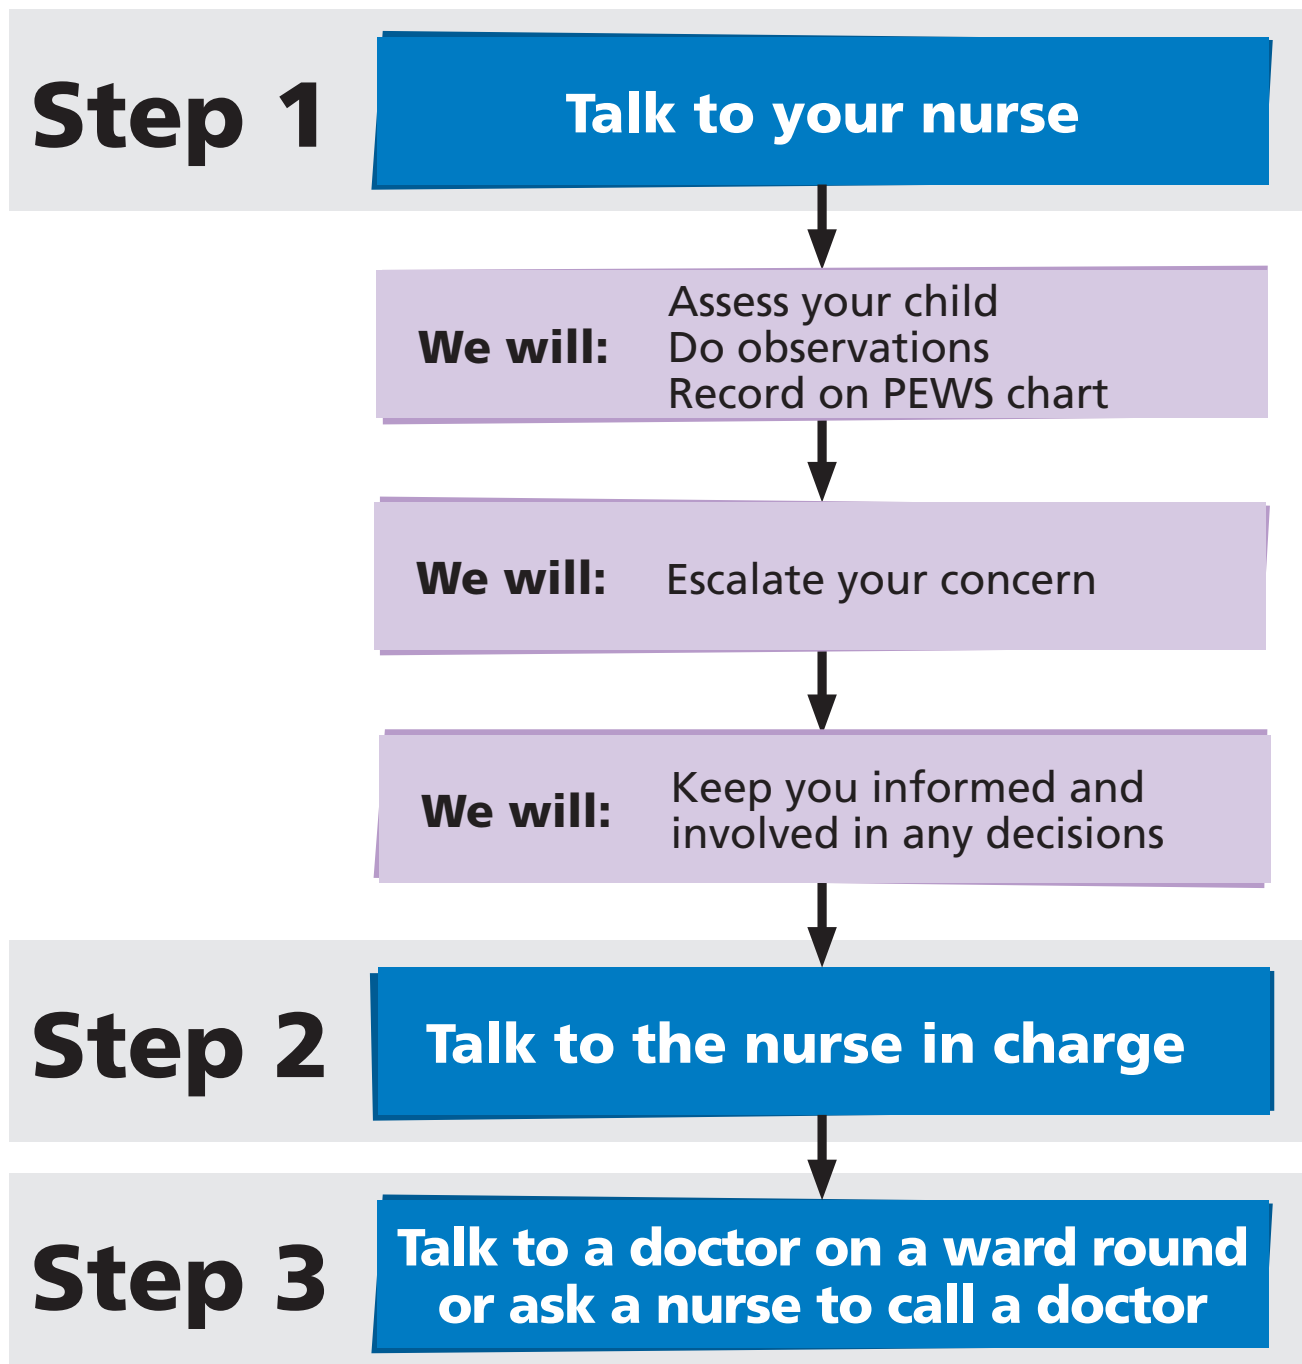

Supplement: s1 [file s1]
