# Supplementary material for: Developing a Tool to Support Communication of Parental Concerns When a Child is in Hospital
Source: MDPI journal article supplement (doi:10.3390/healthcare4010009), 2016-01-13
Supplement: s1 [file s1]

# Talking to staff about your worries: Planning care together

**IF YOU FEEL THIS IS AN EMERGENCY PLEASE CALL FOR IMMEDIATE HELP FROM ANY MEMBER OF STAFF**

My child's name is:

Today's date:

What I would like you to know:  
Sharing my worries, concerns or observations...

What I would like us to do next:  
Planning the journey together...

You can share this information with staff if you wish. This information has been shared with the:

- Bedside Nurse: Name..... Signed..... Date \_\_\_ / \_\_\_ / \_\_\_
- Medical Team: Name..... Signed..... Date \_\_\_ / \_\_\_ / \_\_\_

Please file with the PEWS charts. To be used in conjunction with the **"Listening to You"** project
